# Supplementary material
Source: HighWire-hosted journal article supplement (http://www.qdcxjkg.com/highwire/filestream/113243/field_highwire_adjunct_files/2/Online_supplement_Table_S3.pdf)
Supplement: Online_supplement_Table_S3.pdf [file Online_supplement_Table_S3.pdf]

| Parameter                 | NHANES (n=891) | PAH (n=27) | p*      |
|---------------------------|----------------|------------|---------|
| Age - yr                  | 48.9±19.3      | 43.8±11.9  | >0.05   |
| BMI - kg/m <sup>2</sup>   | 27.8±5.5       | 29.8±6.3   | >0.05   |
| Race/Ethnicity - n (%)    |                |            |         |
| White                     | 486 (54.5)     | 18 (66.7)  | ] 0.01  |
| Hispanic                  | 206 (23.1)     | 5 (18.5)   |         |
| Other                     | 199 (22.4)     | 4 (14.8)   |         |
| Insulin Sensitive - n (%) | 378 (42.4)     | 11 (40.7)  | ] >0.05 |
| Insulin Resistant - n (%) | 315 (35.4)     | 10 (37.1)  |         |
| Indeterminent - n (%)     | 198 (22.2)     | 6 (22.2)   |         |
| Cardiovascular Dz - n (%) | 93 (10.4)      | -          |         |

**Table S3.** Demographic & Metabolic Characteristics of Male PAH Cohort. Analysis of a small cohort of PAH males does not demonstrate a higher prevalence of insulin resistance as compared with NHANES controls. Data collection was in nondiabetic male subjects: NHANES 2003-2004 cohort, PAH 2003-2006 cohort. All values indicate mean ±SD. Triglyceride (TG) to high-density lipoprotein cholesterol (HDL-C) ratio (TG/HDL-C) characterizes individuals as insulin sensitive (TG/HDL-C<2) or insulin resistant (TG/HDL-C>3). \* p-values for Age & BMI were based on Mann-Whitney U test, and chi-squared analysis for Race/Ethnicity & insulin resistance profile. NHANES = National Health And Nutrition Surveys, BMI = Body Mass Index, PAH = Pulmonary Arterial Hypertension.
